# Supplementary material for: Bax-Induced Apoptosis in Leber's Congenital Amaurosis: A Dual Role in Rod and Cone Degeneration
Source: PubMed Central journal article supplement (PMC2720534; doi:10.1371/journal.pone.0006616), 2009-08-12
Supplement: pone.0006616.s001.pdf [file pone.0006616.s001.pdf]

| <b>Gene</b> | <b>Strand</b> | <b>Nucleotide sequence (5' - 3')</b> |
|-------------|---------------|--------------------------------------|
| Gnat1       | Forward       | AGA GGA TGC TGA GAA GGA TG           |
|             | Reverse       | ACT GAA TCT TGA GCG TGG TC           |
| Rhodopsin   | Forward       | CTC CAT GCT GGC AGC GTA CA           |
|             | Reverse       | TGC TCA TCG GCT TGC AGA CC           |
| Rom-1       | Forward       | CCA TGA AGT GCT GCT GGA AC           |
|             | Reverse       | GGC CTC AGC TAG AAC TTC CT           |
| Rds         | Forward       | GGC TTA CGG ACT CAA GAA TG           |
|             | Reverse       | GTG AGC TGG TAC TGG ATA CA           |
| Gnat2       | Forward       | CAT CAG TGC TGA GGA CAA AG           |
|             | Reverse       | GAC TGG AAC TCT AGG CAC TC           |
| SWL opsin   | Forward       | TGG TCA ACA ATC GGA ACC AC           |
|             | Reverse       | AGG GCC AAC TTT GCT AGA AG           |
| MWL opsin   | Forward       | TGA GGA TAG CAC CCA TGC AA           |
|             | Reverse       | GGC GCA GCT TCT TGA ATC TC           |
| Bax         | Forward       | GGC TGG ACA CTG GAC TTC CT           |
|             | Reverse       | GGT GAG GAC TCC AGC CAC AA           |
| Bcl-2       | Forward       | TTC GCA GAG ATG TCC AGT CA           |
|             | Reverse       | TTC AGA GAC AGC CAG GAG AA           |
| Crx         | Forward       | GCT TCT GCT TTC TGT TCT TC           |
|             | Reverse       | AAC TTC CAG GCA CTC TGA TC           |
| Gapdh       | Forward       | GAG GCC GGT GCT GAG TAT GT           |
|             | Reverse       | GGT GGC AGT GAT GGC ATG GA           |
